# Supplementary material for: Two heteroleptic Ir(iii)–bisthienylethene compounds: syntheses, structures and aggregation-induced luminescence
Source: Royal Society of Chemistry journal article supplement (doi:10.1039/c4ra15977b), 2015-01-01
Supplement: c4ra15977b1.pdf [file c4ra15977b1.pdf]

## Electronic Supporting Information

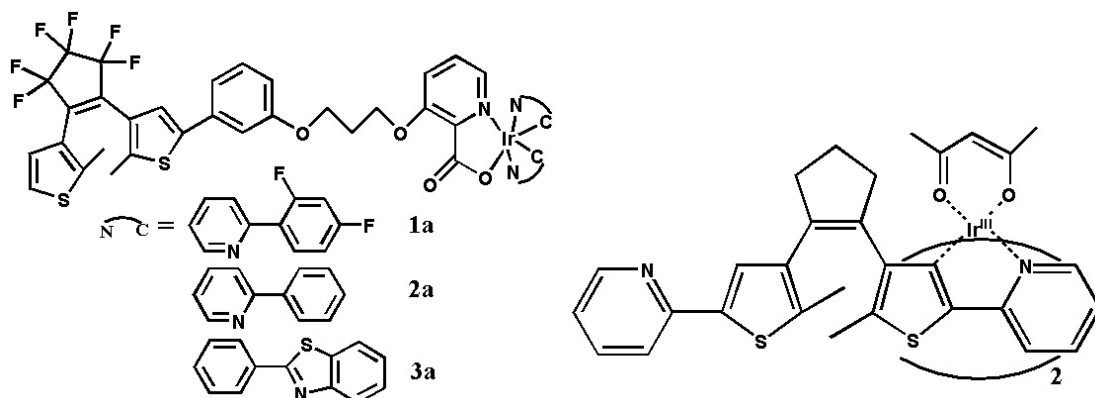

Scheme S1

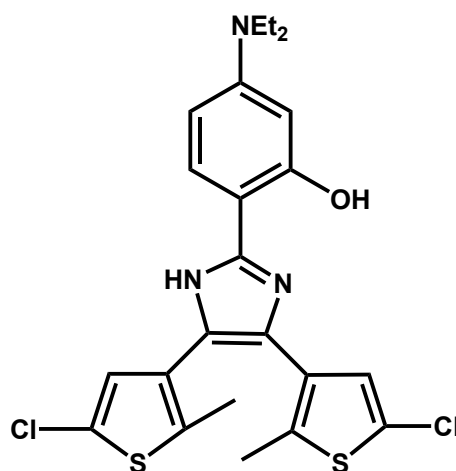

Scheme S2

**Table S1** UV-vis absorption bands of hnbdtiH, **1** and **2** in CH<sub>2</sub>Cl<sub>2</sub> at room temperature.

| Compound | $\lambda_{\max}$ (nm) |
|----------|-----------------------|
| hnbdtiH  | 240, 276, 361         |
| <b>1</b> | 257, 289, 390         |
| <b>2</b> | 258, 289, 390, 467    |

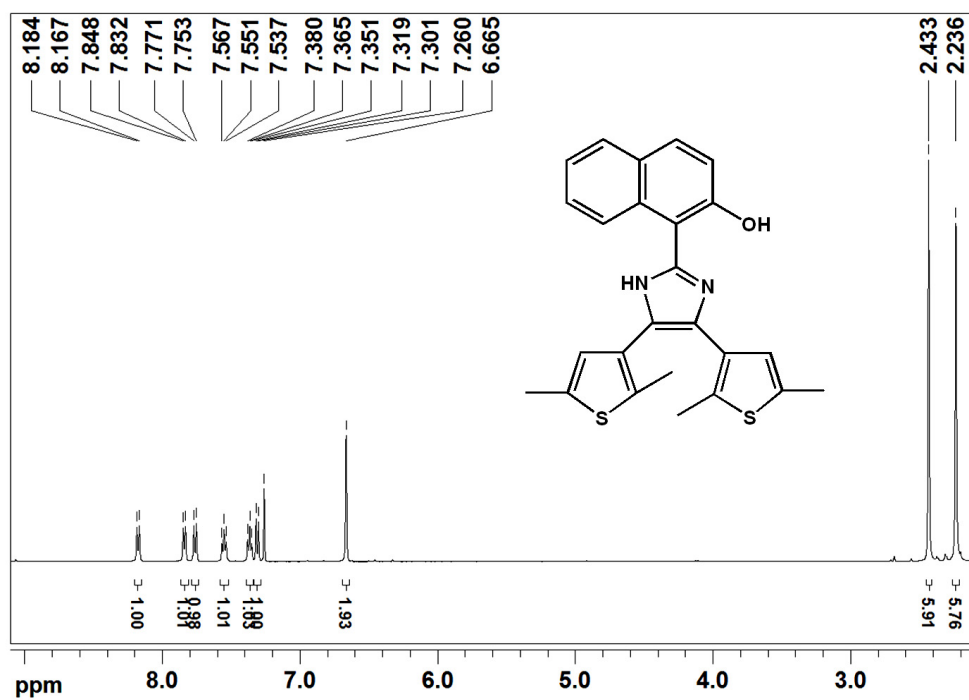

Fig. S1  $^1\text{H}$  NMR spectrum of hnbdtiH (500 MHz,  $\text{CDCl}_3$ ).

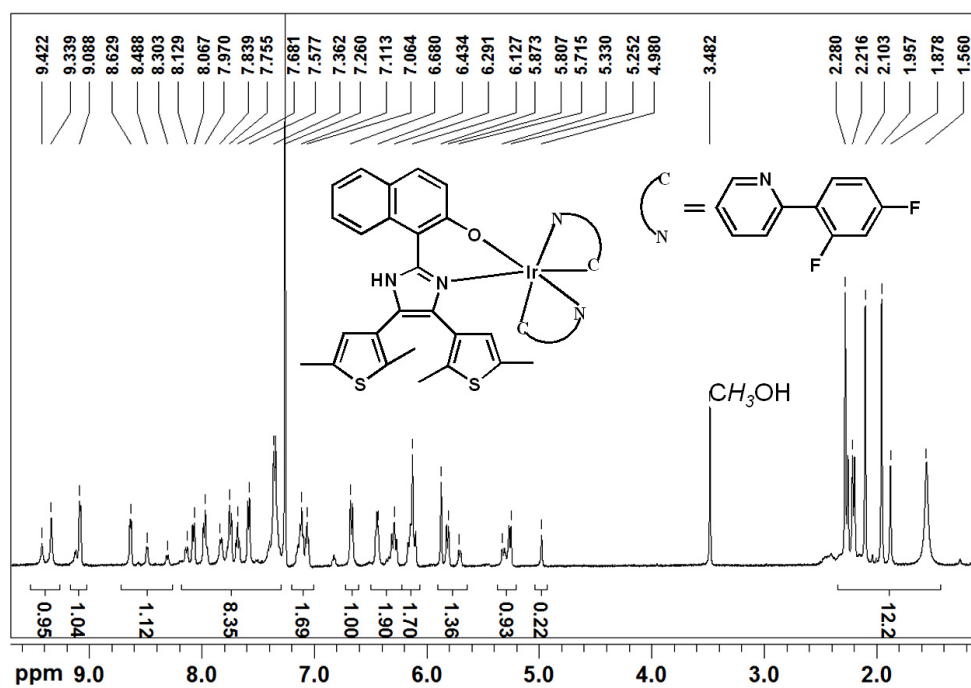

Fig. S2  $^1\text{H}$  NMR spectrum of 1 (500 MHz,  $\text{CDCl}_3$ ).

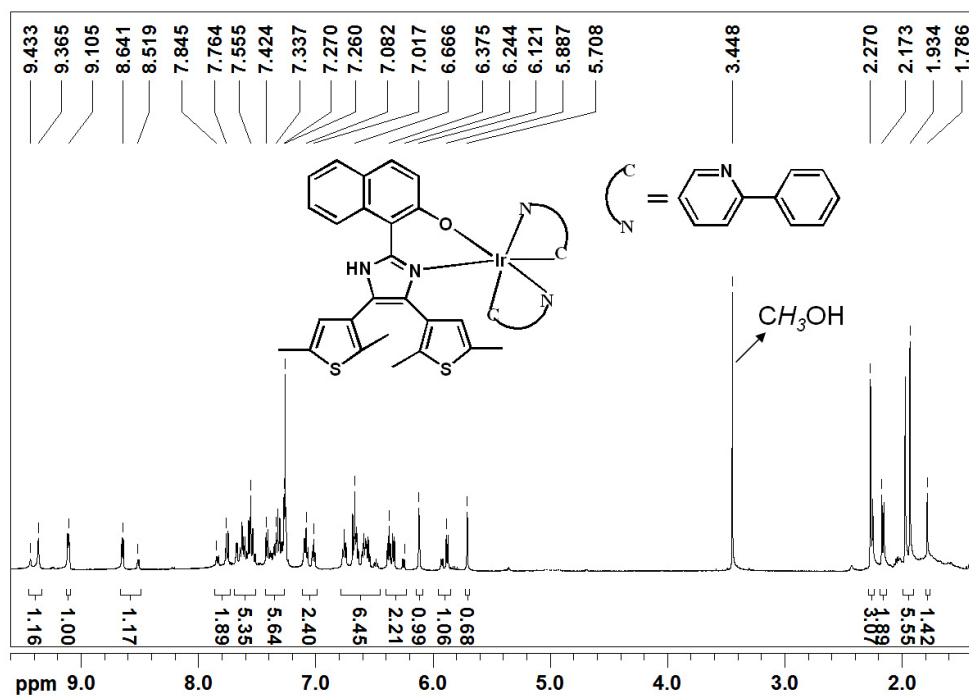

Fig. S3  $^1\text{H}$  NMR spectrum of 2 (500 MHz,  $\text{CDCl}_3$ ).

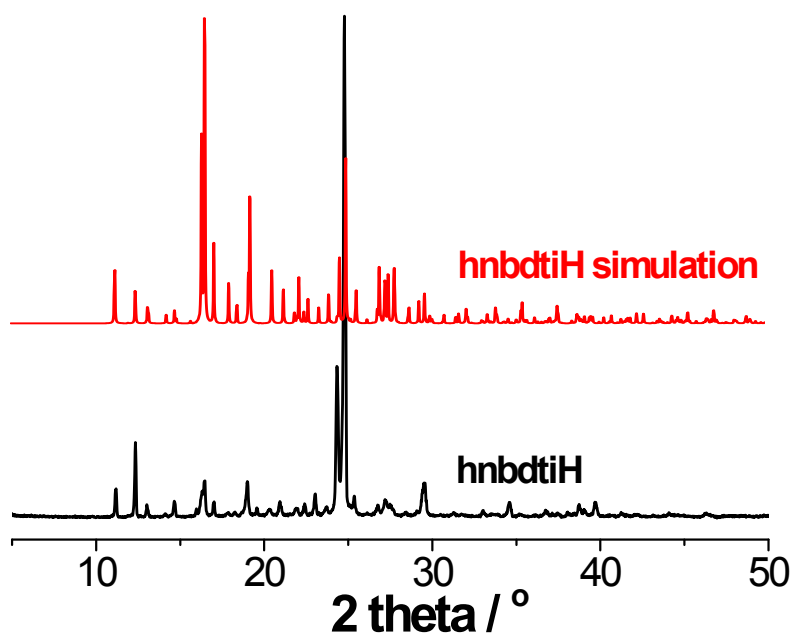

Fig. S4 Experimental and simulated XRD patterns of hnbdtiH.

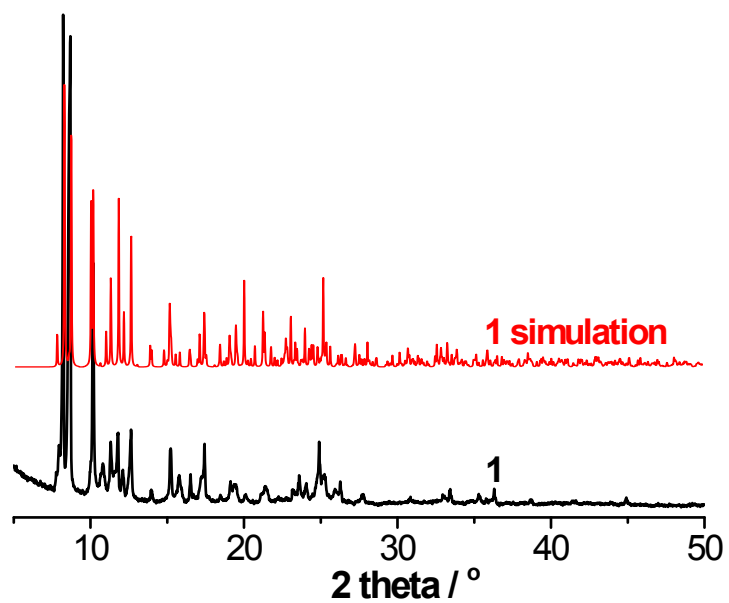

**Fig. S5** Experimental and simulated XRD patterns of 1.

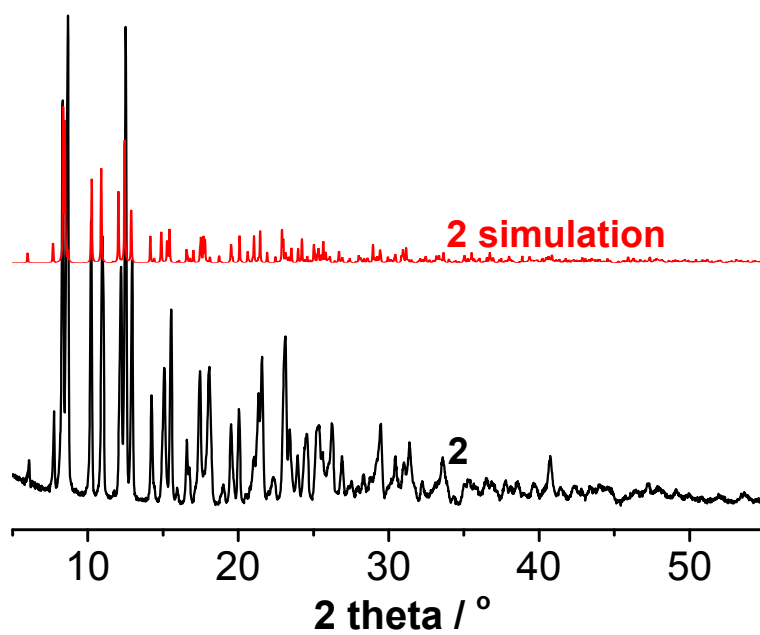

**Fig. S6** Experimental and simulated XRD patterns of 2.

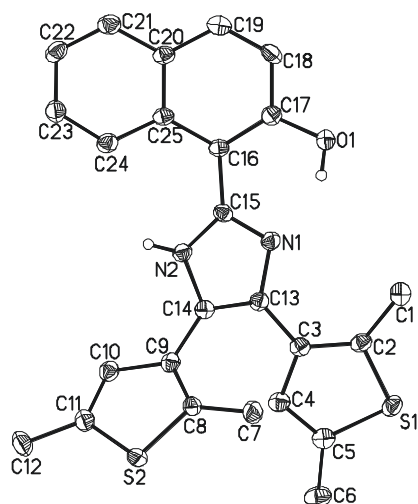

**Fig. S7** Molecular structure of hnbdtiH (50% probability). All H atoms attached to C atoms are omitted for clarity.

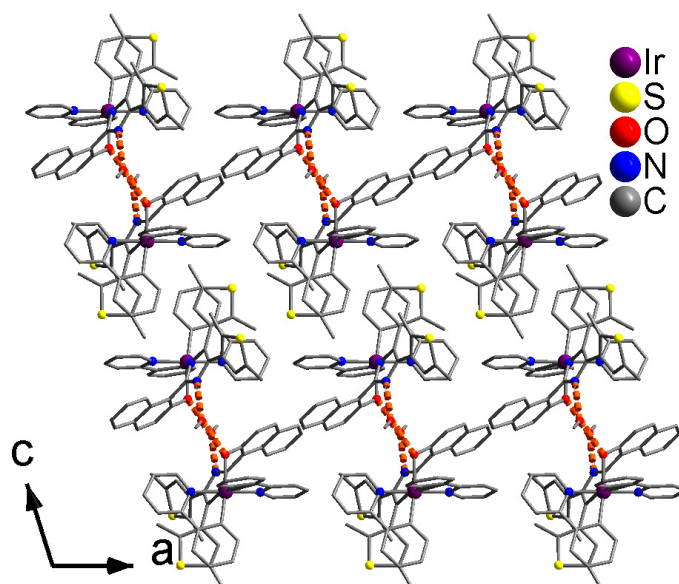

**Fig. S8** Packing structure of **2**.

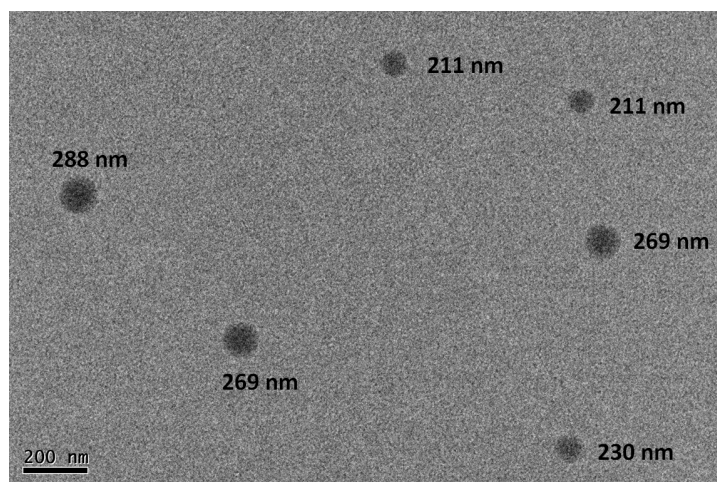

**Fig. S9** The morphology of **1** in CH<sub>3</sub>CN–H<sub>2</sub>O mixture (v/v = 1/1, c = 2 × 10<sup>-5</sup> M), showing particles with a size range of 200-300 nm.

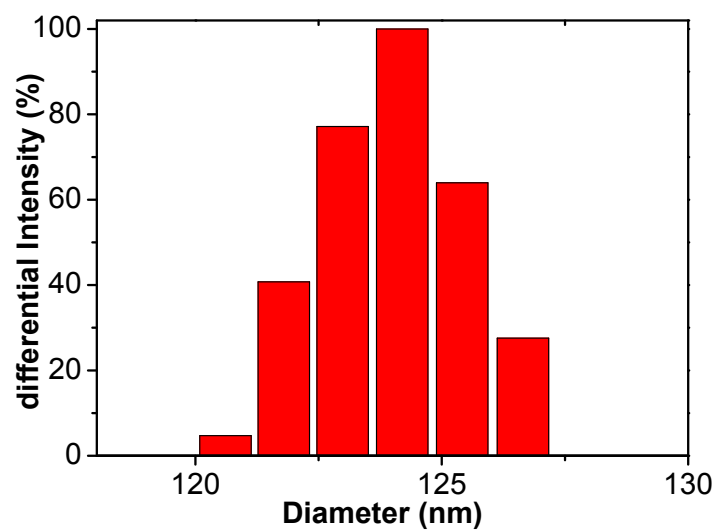

**Fig. S10** Particle size distributions of **1** in CH<sub>3</sub>CN–H<sub>2</sub>O mixture (v/v = 1/1, c = 2 × 10<sup>-5</sup> M).

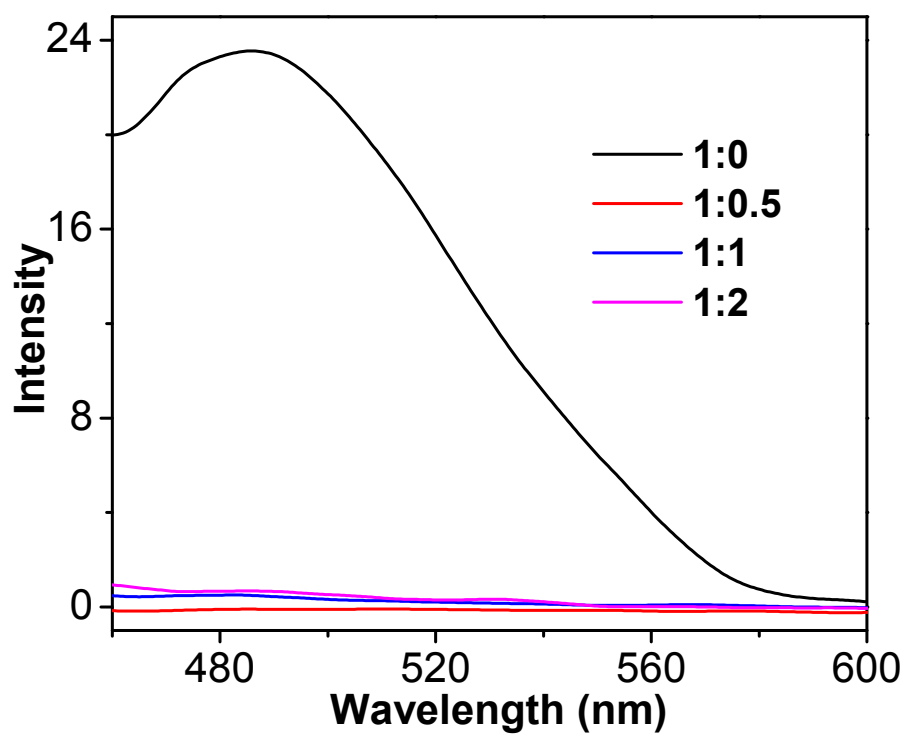

**Fig. S11** Luminescence spectra of **2** in CH<sub>3</sub>CN-H<sub>2</sub>O mixtures with different water fractions.
